# Supplementary material for: Structure transformation and remarkable site-distribution modulation of Eu3+ions in CaMoO4 : Eu3+nanocrystals under high pressure
Source: Royal Society of Chemistry journal article supplement (doi:10.1039/c5ce01580d), 2015-01-01
Supplement: c5ce01580d1.pdf [file c5ce01580d1.pdf]

**Structure transformation and remarkable site-distribution modulation of  $\text{Eu}^{3+}$  ions in  $\text{CaMoO}_4:\text{Eu}^{3+}$  nanocrystals  
under high pressure**

**Zhi Zhao,<sup>a</sup> Zhilei Sui,<sup>b</sup> Xiantao Wei,<sup>c</sup> Jian Zuo,<sup>a</sup> Xianwen Zhang,<sup>\*d</sup> Rucheng Dai,<sup>c</sup> Zengming Zhang<sup>\*c</sup> and Zejun Ding<sup>a,b</sup>**

<sup>a</sup>Hefei National Laboratory for Physical Sciences at the Microscale, University of Science and Technology of China, Hefei, 230026, China

<sup>b</sup>Department of Physics, University of Science and Technology of China, Hefei, 230026, China

<sup>c</sup>The Center of Physics Experiment, School of Physical Sciences, University of Science and Technology of China, Hefei 230026, China

<sup>d</sup>Institute of Advanced Energy Technology and Equipment, Hefei University of Technology, Hefei, 230009, China

\*Corresponding authors: [xianwen.zhang@hfut.edu.cn](mailto:xianwen.zhang@hfut.edu.cn), [zzm@ustc.edu.cn](mailto:zzm@ustc.edu.cn)

**Experimental results:**

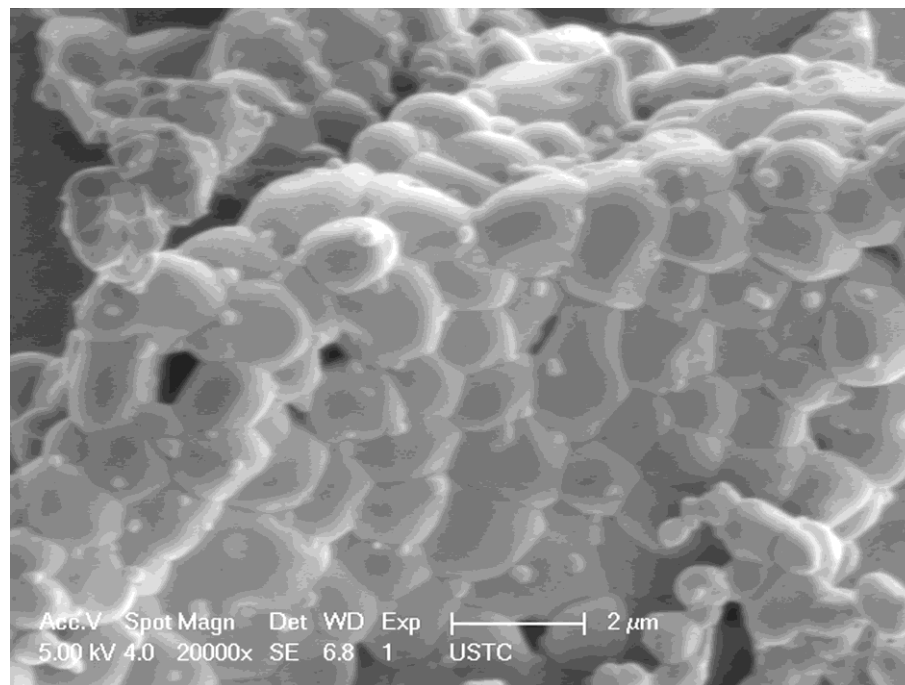

**Fig. S1** The SEM image of CaMoO<sub>4</sub>:Eu<sup>3+</sup> calcined at 1000 °C for 6 hours.

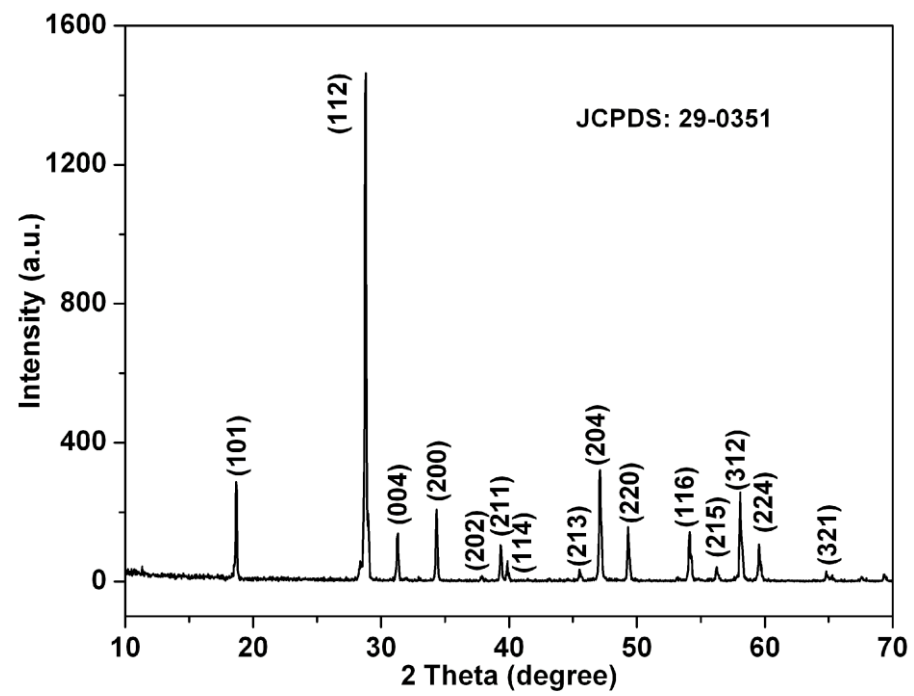

Fig. S2 The XRD patterns of CaMoO<sub>4</sub>:Eu<sup>3+</sup> calcined at 1000 °C for 6 hours.

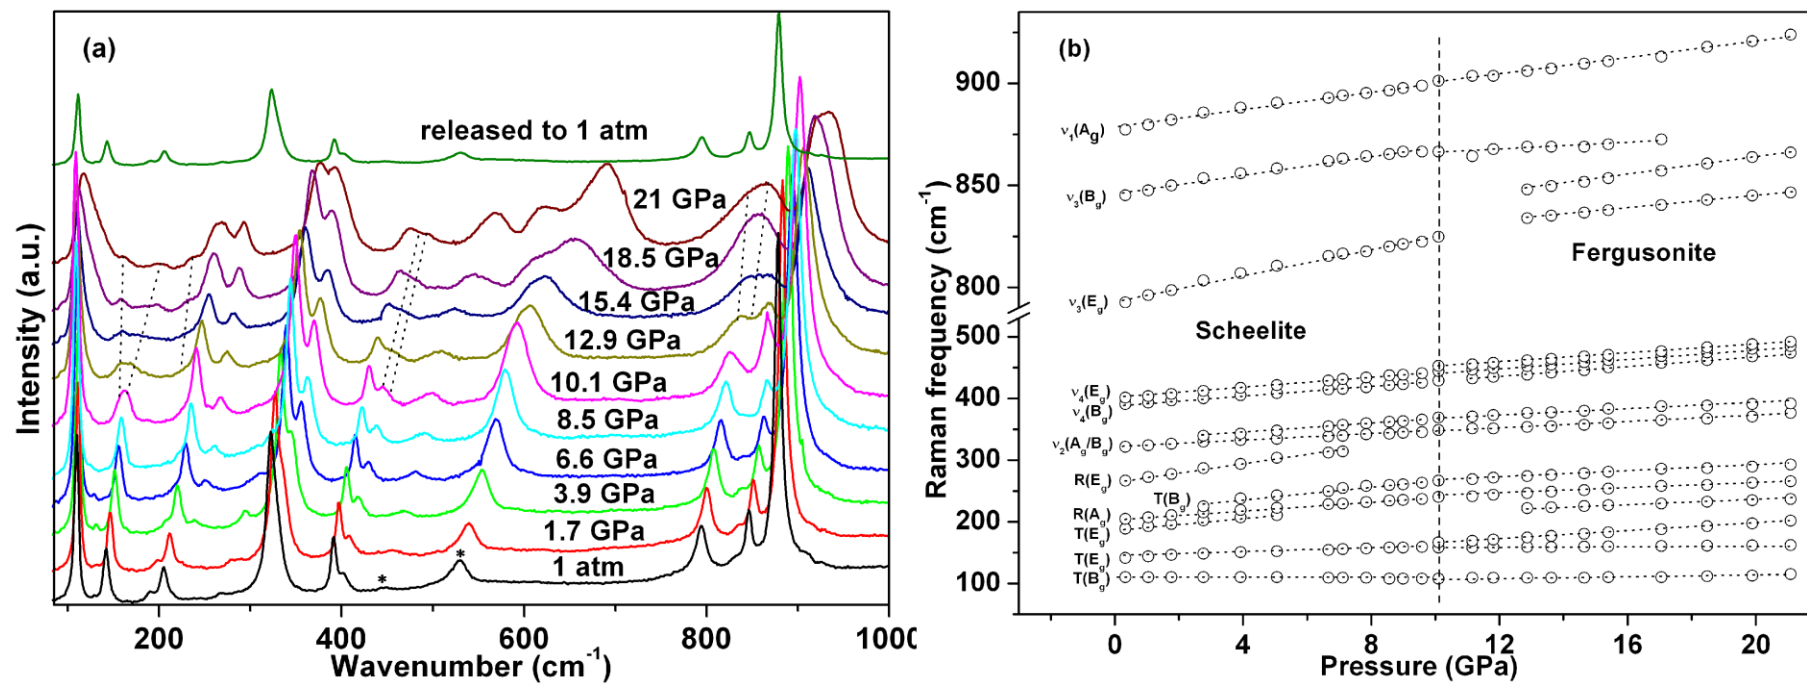

**Fig. S3 (a)** Raman spectra of  $\text{CaMoO}_4:\text{Eu}^{3+}$  bulk at different pressures. Asterisks refer to emissions from the  $^5\text{D}_0 \rightarrow ^7\text{F}_3$  transition of  $\text{Eu}^{3+}$  ions. (b)

Pressure dependence of the shifts of Raman modes of  $\text{CaMoO}_4:\text{Eu}^{3+}$  bulk.

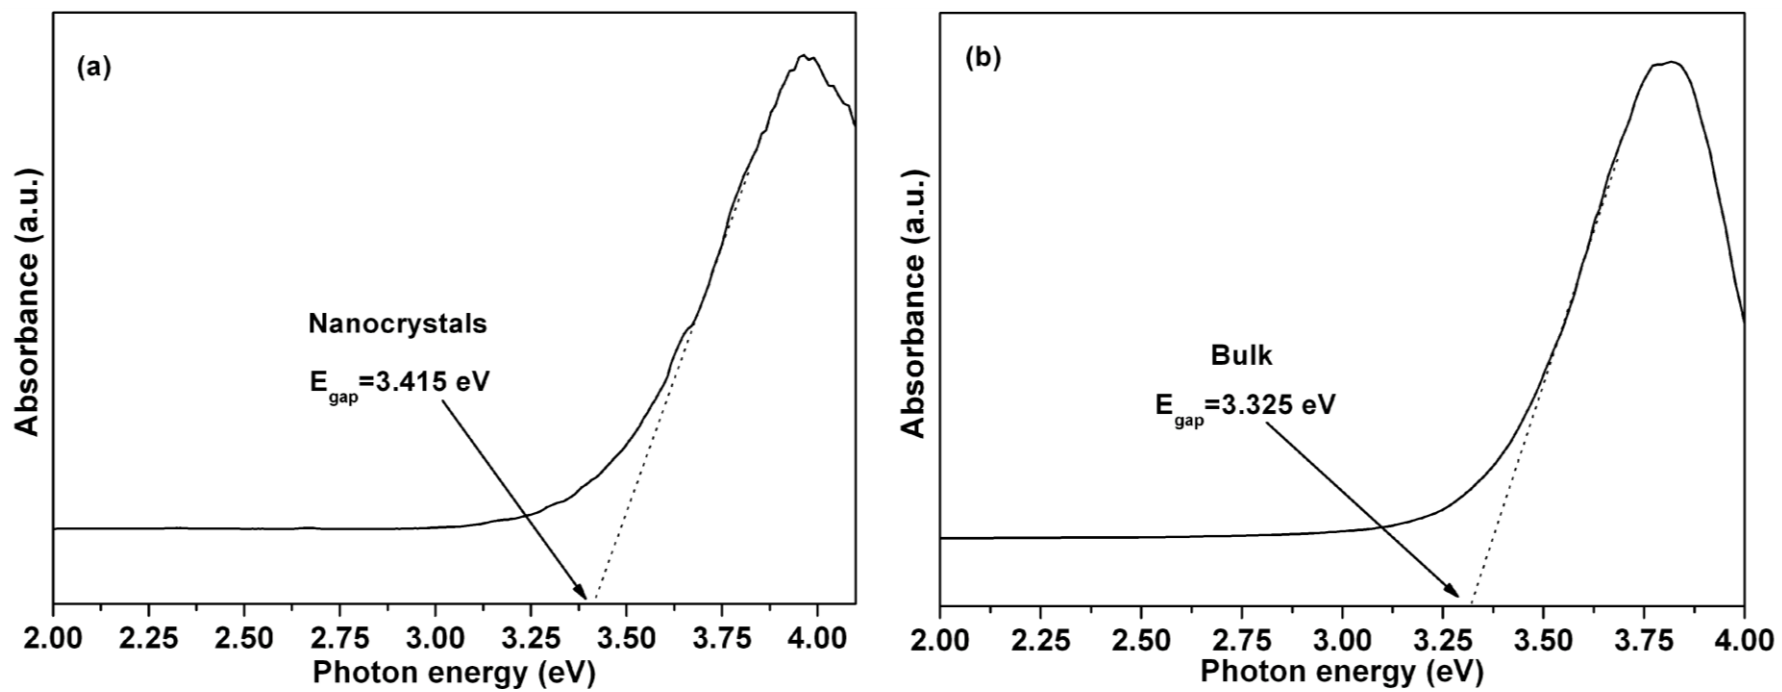

**Fig. S4** UV-vis absorbance spectra of  $\text{CaMoO}_4:\text{Eu}^{3+}$  nanocrystals (a) and bulk (b) at ambient pressure.

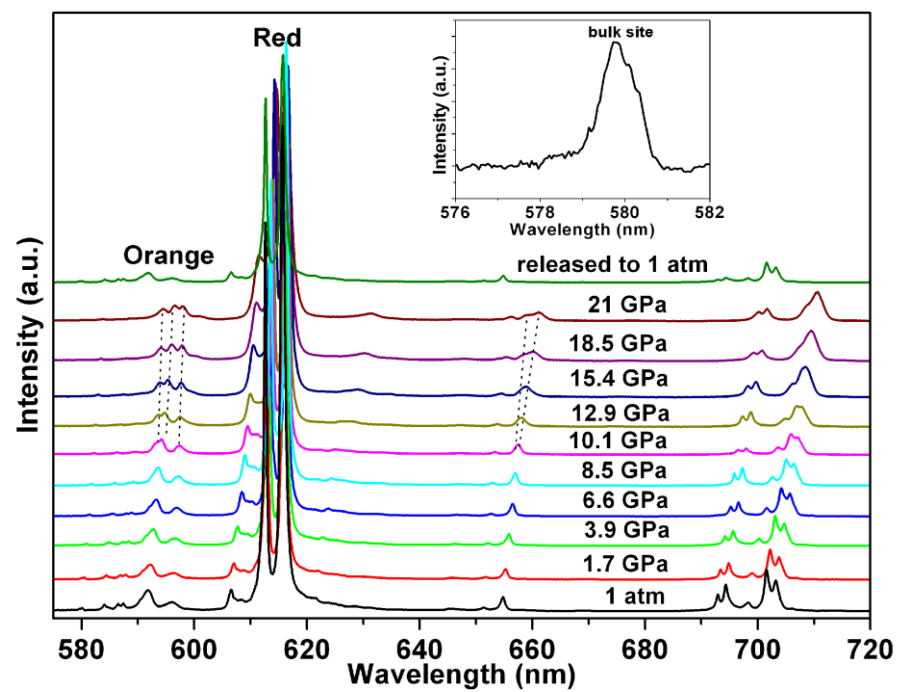

**Fig. S5** Photoluminescence spectra of  $\text{CaMoO}_4:\text{Eu}^{3+}$  bulk at different pressures. The inset is the enlarged emission spectra of  ${}^5\text{D}_0 \rightarrow {}^7\text{F}_0$  transition of  $\text{CaMoO}_4:\text{Eu}^{3+}$  bulk at ambient pressure.
